# Supplementary material
Source: publisher site journal article supplement (https://www.spandidos-publications.com/1961/downloadSupplementary)

Figure S1. Overexpression of Sox9 in tubular epithelial cells does not activate the Wnt signaling pathway. (A) RT-qPCR and (B) western blotting were used to analyze the mRNA and protein expression levels, respectively, of  $\beta$ -catenin in tubular epithelial cells following the overexpression of Sox9. (C) RT-qPCR was used to analyze the mRNA expression levels of the Wnt ligand, FZD5, and target genes of the Wnt signaling pathway, c-Myc and TCF4 in tubular epithelial cells following the overexpression of Sox9.  $n=3$ /group, western blotting experiments were repeated once. Data are presented as the mean  $\pm$  SD. LV-Sox9, stabilized Sox9 expressing lentivirus; NC, negative control; FZD5, Frizzled-5; TCF4, transcription factor 4; RT-qPCR, reverse transcription-quantitative PCR.

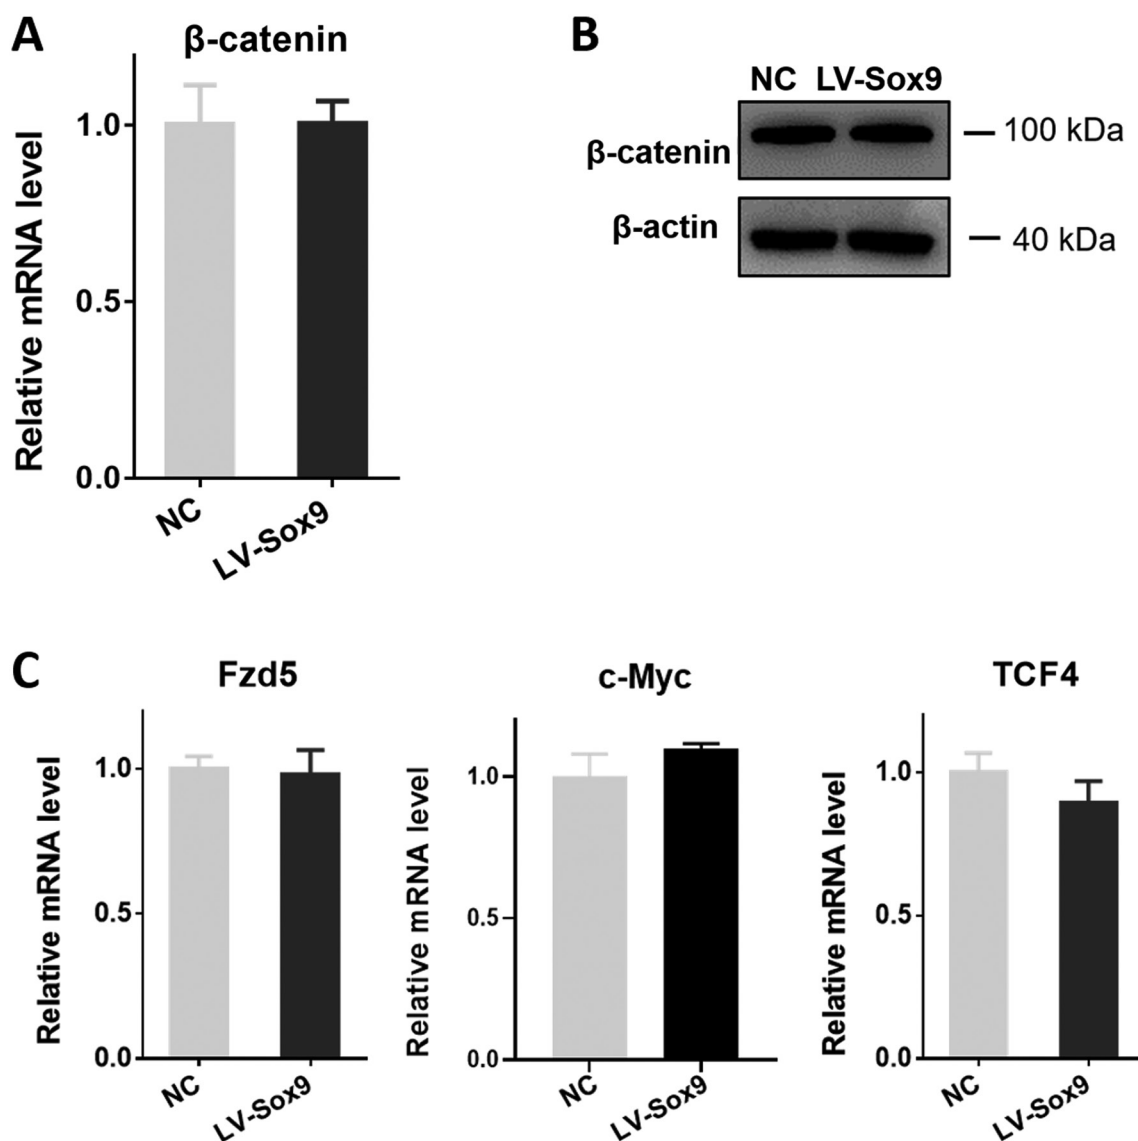

Supplement: Supplementary file 1 [file downloadSupplementary]
